# Supplementary material for: Human Papilloma Virus Vaccination in Patients with Rheumatic Diseases in France: A Study of Vaccination Coverage and Drivers of Vaccination
Source: MDPI journal article supplement (doi:10.3390/jcm11144137), 2022-07-16
Supplement: s1 [file s1]

**Supplementary Table S1.** Vaccination schedule at the time of the study

| Type of vaccine          | Initial Vaccination                                                  | Catch-up program                                                                                 |
|--------------------------|----------------------------------------------------------------------|--------------------------------------------------------------------------------------------------|
| Quadrivalent (Gardasil®) | between 11 and 13 years old with 2 doses at 6-month intervals        | between 14 and 19 years old with 3 doses administered according to a 0-, 2- and 6-month schedule |
| Bivalent (Cervarix®)     | between 11 and 14 years old with 2 doses at 6-month intervals        | between 15 and 19 years old with 3 doses administered according to a 0-, 2- and 6-month schedule |
| Nonvalent (Gardasil9®)   | between 11 and 14 years old with 2 doses at 6- to 13-month intervals | between 15 and 19 years old with 3 doses administered according to a 0-, 2- and 6-month schedule |

Supplementary Table S1:

HPV vaccination schedule in France in 2018 according to the weekly epidemiological bulletin (*Bulletin Épidémiologie Hebdomadaire*) [13]

**Supplementary Table S2.** Comparison of vaccinated and non-vaccinated patients.

| Characteristics            | Vaccinated patients (n=28) | Non-vaccinated patients (n=43) | OR    | 95% CI        | p-value* |
|----------------------------|----------------------------|--------------------------------|-------|---------------|----------|
| <b>Bivariate Model</b>     |                            |                                |       |               |          |
| Age Group [11,12]          | 1 (4%)                     | 22 (71%)                       | 1     |               | <0.001   |
| Age Group [13,18]          | 22 (96%)                   | 9 (29%)                        | 53.68 | 5.85 – 492.29 |          |
| Hepatitis B not-vaccinated | 5 (22%)                    | 18 (58%)                       | 1     |               | 0.040    |
| Hepatitis B vaccinated     | 18 (78%)                   | 13 (42%)                       | 4.97  | 1.03 – 24.01  |          |
| <b>Bivariate Model</b>     |                            |                                |       |               |          |
| Paris                      | 15 (65%)                   | 11 (34%)                       | 1     |               | 0.063    |
| Lyon                       | 8 (35%)                    | 21 (66%)                       | 0.33  | 0.10 – 1.08   |          |
| Hepatitis B not-vaccinated | 5 (22%)                    | 18 (56%)                       | 1     |               | 0.024    |
| Hepatitis B vaccinated     | 18 (78%)                   | 14 (44%)                       | 4.01  | 1.15 – 14.00  |          |

\* Likelihood ratio test
